# Supplementary material for: The essence of the effect of strain rate on the mechanical behavior of the Fe14.6Ni (at%) elastocaloric refrigeration alloy: a molecular dynamics study
Source: Royal Society of Chemistry journal article supplement (doi:10.1039/d3na00691c), 2023-12-22
Supplement: d3na00691c1.pdf [file d3na00691c1.pdf]

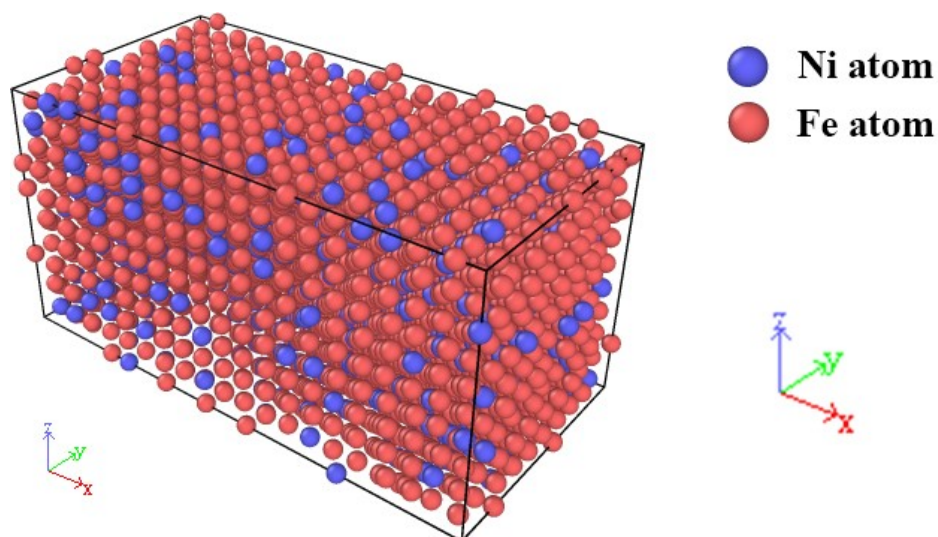

**Fig.S0.** Molecular dynamics simulation model of Fe<sub>14.6</sub>Ni (at %) alloy. Fe atoms were in red and Ni atoms were in blue.

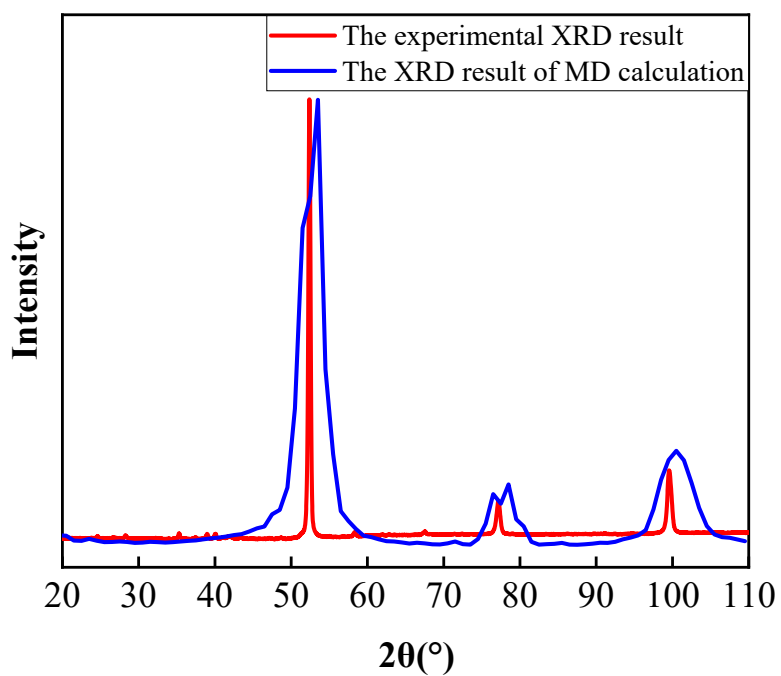

**Fig.S1.** The XRD diffraction pattern of Fe<sub>14.6</sub>Ni(at%) alloy detected by experimental method and calculated by MD simulation

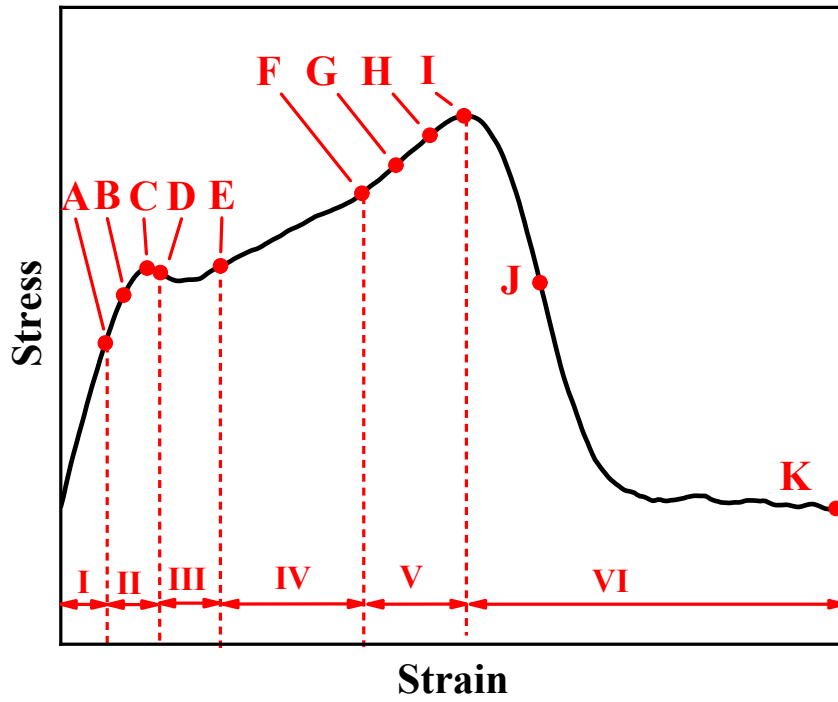

Fig.S2. The six stages of the stress-strain curve.

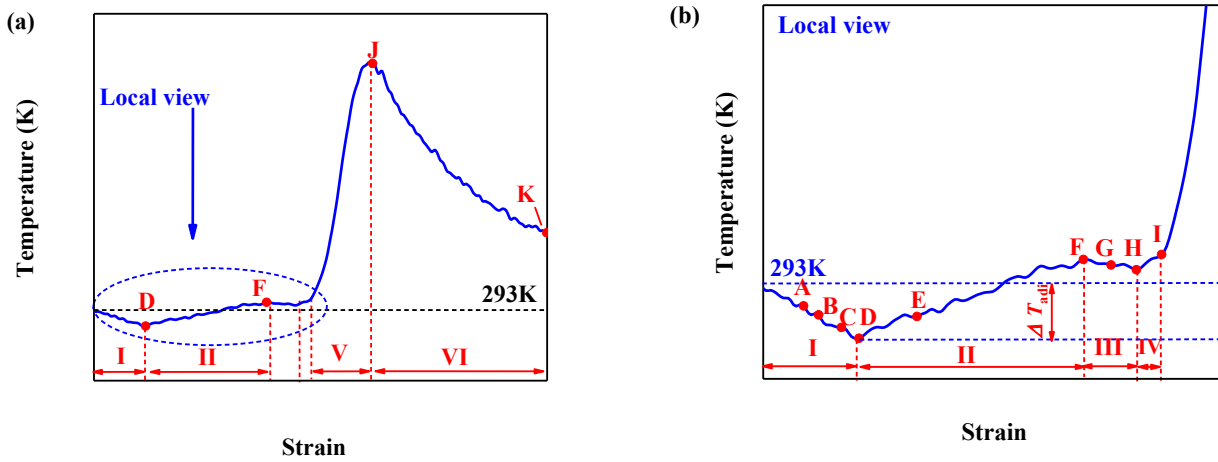

Fig.S3. The six stages of the temperature variation process. (a)The global view;(b) The local view.

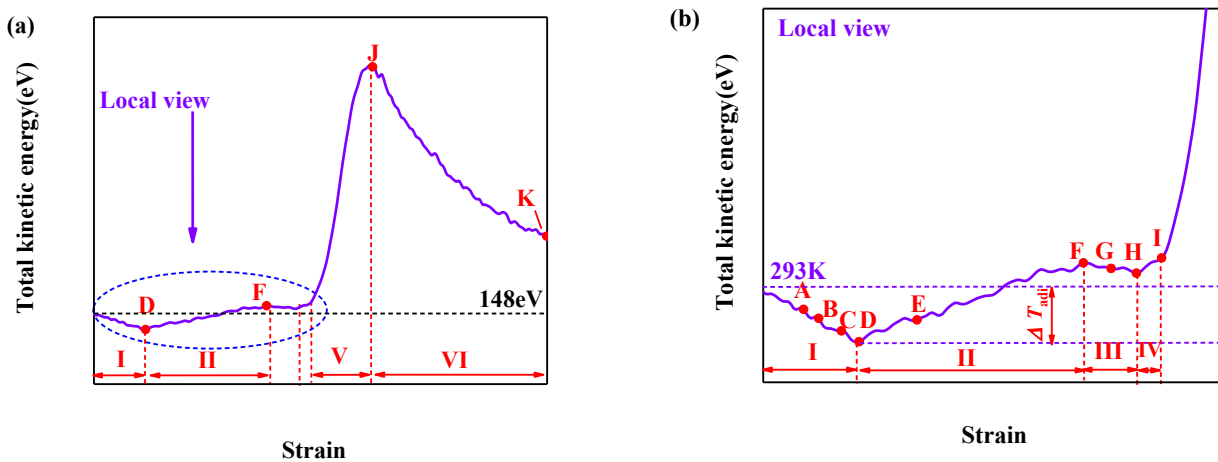

Fig.S4. The six stages of the total kinetic energy variation process. (a)The global view;(b) The local view.

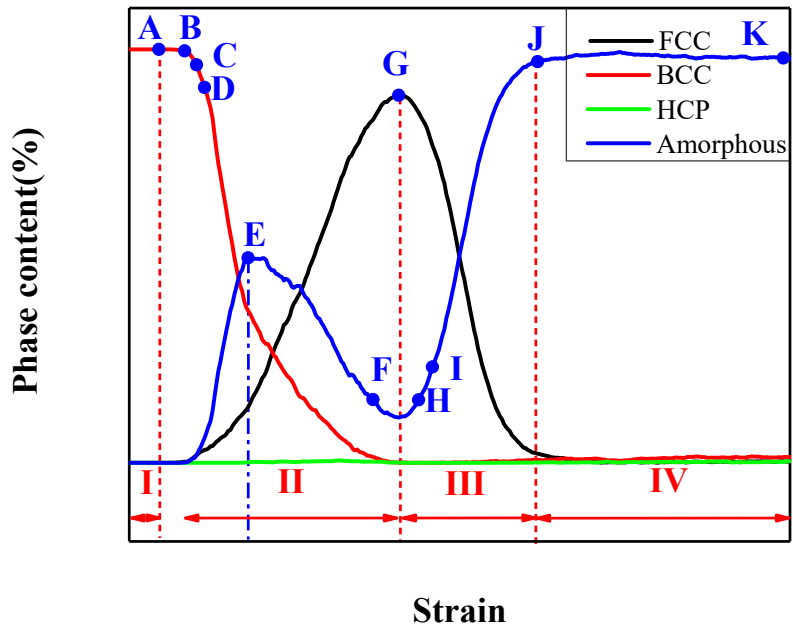

Fig.S5. The six stages of the phase content evolution processes.
